# Supplementary material for: Prospective evaluation of methylated SEPT9 in plasma for detection of asymptomatic colorectal cancer
Source: PubMed Central journal article supplement — Gut. 2013 Feb 13;63(2):317–25. doi: 10.1136/gutjnl-2012-304149 (PMC3913123; doi:10.1136/gutjnl-2012-304149), 2013-02-13
Supplement: gutjnl-2012-304149-s2.pdf [file gutjnl-2012-304149-s2.pdf]

## **Appendix:**

### **PRESEPT Site Principal Investigators**

John I. Allen, MD, Minnesota Gastroenterology, Minneapolis, MN

Alireza Aminalai, MD, Private Practice, Berlin, Germany

Jens Aschenbeck, MD, Private Practice, Berlin, Germany

Bhaskar Banerjee, MD, University of Arizona, Tucson, AZ

Robert Lawrence Barclay, MD, Rockford Gastroenterology, Rockford, IL

Roland William Bennetts, Jr., MD, Northwest Gastroenterology, Portland, OR

Berndt Birkner, MD, Private Practice, München, Germany

Michael Bläker, MD, Private Practice, Hamburg, Germany

Carl-Hermann Bothe, Private Practice, Hamburg, Germany

Jens-Peter Bruhn, MD, Private Practice, Hamburg, Germany

William Charles Bray, MD, Digestive Health Specialists, Winston-Salem, NC

Timothy R. Church, PhD, University of Minnesota, Minneapolis, MN

Ralph Czekalla, MD, Private Practice, Munich, Germany

Matthias Ebert, MD, Technische Universität, Munich, Germany

T. Raymond Foley, MD, Regional Gastroenterology Assoc. of Lancaster, Lancaster, PA

W. Stewart Futch, Jr., MD, Southern Gastroenterology Associates, New Bern, NC

Harvey A. Giller, D.O, Digestive & Liver Disease Consultants, Clive, IA

William R. Harlan, III, MD, Asheville Gastroenterology Associates, Asheville, NC

William K. Hirota, MD, Tacoma Digestive Disease Research Center, Tacoma, WA

Reed B. Hogan, MD, SCRI, Jackson, MS

Beate Keck, MD, Private Practice, Hamburg, Germany

Phillip Kiyasu, MD, Portland Gastroenterology, Portland, OR

Burton Lazar, MD, Portland Clinic, Portland, OR

James Leavitt, MD, Gastro Health, Miami, FL

Michael Mayr, Private Practice, Berlin, Germany

Sam E. Moussa, MD, Adobe Clinical Research, Tucson, AZ

Neal Osborn, MD, Atlanta Gastroenterology Associates, Atlanta, GA

Daniel Pambianco, MD, Charlottesville Medical Research, Charlottesville, VA

Joseph Romagnuolo, MD, Medical University of South Carolina, Charleston, SC

Thomas Rösch, MD, University Medical Center Hamburg-Eppendorf, Hamburg,  
Germany

Miroslav Ryschka, MD, Private Practice, Berlin, Germany

Mathias Scheel, MD, Private Practice, Berlin, Germany

Andreas Schröder, MD, Private Practice, Berlin, Germany

Stefan Schubert, MD, Private Practice, Berlin, Germany

John Wo, MD, University of Louisville, Louisville, KY

Robert Wohlman, MD, NW Gastroenterology Assoc., Bellevue, WA

Ziad Younes, MD, GI Center of MidSouth, Germantown, TN

Andrew Zwick, MD, Digestive Care, Boca Raton, FL

**Coordinating Investigator for German Investigative Sites**

Thomas Rösch, MD, University Medical Center, Hamburg-Eppendorf, Germany

**Statistical Support**

Steven J. Mongin, University of Minnesota School of Public Health, Minneapolis, MN, USA; Matthias Burger, previously employed by Epigenomics AG, Berlin, Germany

**Clinical Data Support**

Esmeralda Heiden, MD, PhD, Charité Comprehensive Cancer Center, Berlin, Germany

Shannon Payne, PhD, Santaurus, Inc., San Diego, CA 92130

**Medical Advisors**

Douglas Rex, MD, Indiana University School of Medicine, Indianapolis, IN

Philip Schoenfeld, MD, MEd, MSc, University of Michigan, Ann Arbor, MI

Richard Wender, MD, Thomas Jefferson University, Philadelphia, PA

Deborah Fisher, MD, MHS, Duke University School of Medicine, Durham, NC

Scott Ramsey, MD, PhD, Fred Hutchinson Cancer Center, Seattle, WA

**Clinical Study Steering Committee**

David Ransohoff, MD (Chair), University of NC at Chapel Hill School of Medicine,  
Chapel Hill, NC

Neal Osborn, MD, Atlanta Gastroenterology, Atlanta, GA

Timothy Church, PhD, University of MN School of Public Health, Minneapolis, MN

Brent Blumenstein, PhD, Trial Architecture Consulting, Washington, DC

Dale Snover, MD, University of Minnesota Medical School, Minneapolis, MN

Thomas Rösch, MD, University Medical Center, Hamburg-Eppendorf, Germany

Robert Day\*, MD, PhD, The Fred Hutchinson Cancer Research Center, Seattle, WA and  
Epigenomics, Inc. Seattle, WA

Michael Wandell, PharmD, Houston Area Translational Research Consortium, Rice  
University, Houston, TX

Catherine Lofton-Day, PhD, Project Manager, Epigenomics, Seattle WA

*\*ex officio*
