# Supplementary material for: Prospective evaluation of methylated SEPT9 in plasma for detection of asymptomatic colorectal cancer
Source: HighWire-hosted journal article supplement (doi:10.1136/gutjnl-2012-304149), 2013-02-13
Supplement: gutjnl-2012-304149supp.pdf [file gutjnl-2012-304149supp.pdf]

**Preparation of PCR Master Mix**

- PCR Mix: contains Septin 9 primers, blocker and probe; ACTB primers and probe; dNTPS, buffer, MgCl<sub>2</sub>, water, 24.04 µl/well
  - Oligonucleotide information see Table 1
  - 10 mM dUTP mix
  - 1 M MgCl<sub>2</sub>
- Polymerase: Ready-to-use Taq Polymerase (5 Units/ µl), 0.96 µl/well
- For a single determination 27.7 µl PCR Mix and 1.1 µl Taq Polymerase are required (extra for pipetting loss).

**Supplemental Table 1. Oligonucleotide Sequences and Concentrations**

| PCR           | Forward Primer               | Reverse Primer                        | Blocker                                      | Probe                                                  |
|---------------|------------------------------|---------------------------------------|----------------------------------------------|--------------------------------------------------------|
| SEPT 9        | AAATAATCCCATC<br>CAACTA      | GATT-DS-<br>GTTGTTTATTAGTTAT<br>TATGT | GTTATTATGTTGGA<br>TTTTGTGGTTAATG<br>TGTAG-C3 | 6FAM-<br>TTAACCGCGAAATCCGA<br>C-BBQ                    |
| ASSAY<br>CONC | 0.3µM                        | 0.3µM                                 | 1.0 µM                                       | 0.1 µM                                                 |
| ACTB          | GTGATGGAGGAG<br>GTTTAGTAAGTT | CCAATAAAACCTACT<br>CCTCCCTTAA         |                                              | Rhodamin 6G-<br>ACCACCACCCAACACAC<br>AATAACAAACACA-BBQ |
| ASSAY<br>CONC | 0.9 µM                       | 0.9 µM                                | N/A                                          | 0.1 µM                                                 |

**Supplemental Table 2: Preparation of PCR Master Mix (MM)**

| Component      | Volume for<br>8 PCRs<br>(4 determinations) | Volume for<br>12 PCRs<br>(6 determinations) | Volume for<br>24 PCRs<br>(12 determinations) | Volume for<br>48 PCRs<br>(24 determinations) |
|----------------|--------------------------------------------|---------------------------------------------|----------------------------------------------|----------------------------------------------|
| PCR Mix        | 221.2 µl                                   | 331.7 µl                                    | 663.5 µl                                     | 1327.0 µl                                    |
| Taq Polymerase | 8.8 µl                                     | 13.2 µl                                     | 26.5 µl                                      | 53.0 µl                                      |

**Supplemental Table 3: Recommended Cycling Program**

| Program Parameter | Denaturation | Cycling             |          |          | Cooling  |
|-------------------|--------------|---------------------|----------|----------|----------|
| Analysis Mode     | None         | Quantification mode |          |          | None     |
| Cycles            | 1            | 50                  |          |          | 1        |
| Segment           | 1            | 1                   | 2        | 3        | 1        |
| Target [°C]       | 94           | 93                  | 62       | 57       | 40       |
| Hold [hh:mm:ss]   | 00:30:00     | 00:00:10            | 00:00:05 | 00:00:30 | 00:00:30 |

|            |                  |      |      |      |        |      |
|------------|------------------|------|------|------|--------|------|
| LC<br>480* | Ramp Rate [°C/s] | 4.4  | 2.2  | 2.2  | 2.2    | 2.2  |
|            | Acquisition Mode | None | None | None | Single | None |

\* LightCycler® 480 System: select the Dual Color Hydrolysis Probe/UPL Probe as detection format, activate the filter combination 483 – 533 nm and 523 – 568 nm. For LightCycler® 480 II activate the filter combination 465 – 510 nm and 533 – 580 nm.
